# Supplementary material for: Facile controlled growth of multilayer h-BN thin films using spaced-confined APCVD and its gate dielectric application
Source: Royal Society of Chemistry journal article supplement (doi:10.1039/d4ce01138d), 2025-01-01
Supplement: d4ce01138d1.pdf [file d4ce01138d1.pdf]

*Supplementary Information for*

**Facile controlled growth of multilayer h-BN thin films using  
spaced-confined APCVD and its gate dielectric application**

Yajuan Zhao,<sup>\*ad</sup> Liang Shi,<sup>a</sup> Yalong Li,<sup>a</sup> Qian Ma,<sup>a</sup> Jialu Huang,<sup>a</sup> Wenyan Li,<sup>a</sup> Zhen Fu<sup>\*c</sup>  
and Haolin Wang<sup>\*bd</sup>

<sup>a</sup> *School of Materials Science & Engineering, Shaanxi Key Laboratory of Green Preparation and Functionalization for Inorganic Materials, Shaanxi University of Science & Technology, Xi'an Shaanxi, 710021, P.R. China.*

<sup>b</sup> *School of Advanced Materials and Nanotechnology, Xidian University, Xi'an Shaanxi, 710071, P.R. China.*

<sup>c</sup> *Beijing Smartchip Microelectronics Technology Co., Ltd., Beijing 102200, P.R. China.*

<sup>d</sup> *National Laboratory of Solid State Microstructures, School of Physics, Collaborative Innovation Center of Advanced Microstructures, Nanjing University, Nanjing, Jiangsu, 210093, P.R. China.*

<sup>\*</sup>Corresponding author. E-mail addresses: zhaoyajuan@sust.edu.cn (Yajuan Zhao), fuzhen@sgchip.sgcc.com.cn (Zhen Fu), and hlwang@xidian.edu.cn (Haolin Wang).

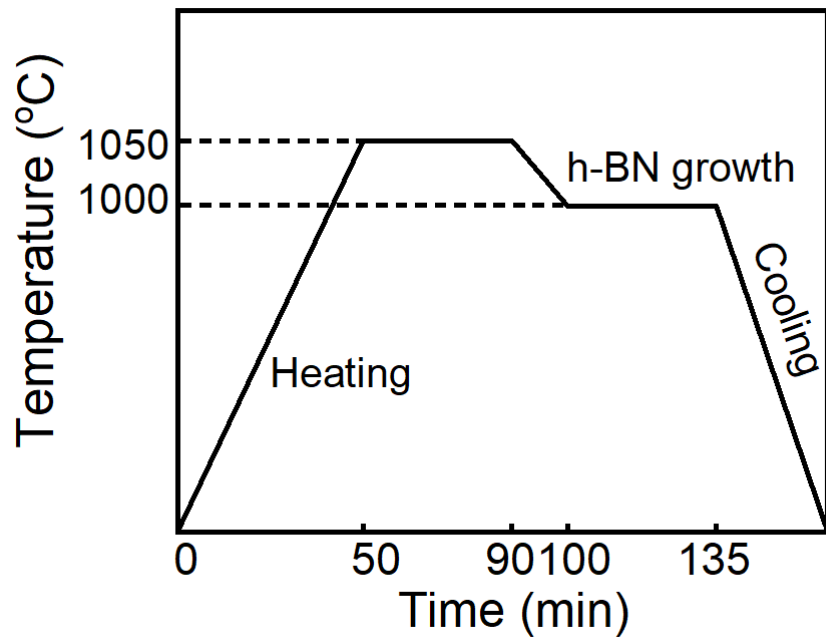

**Fig. S1** Temperature profile of APCVD growth.

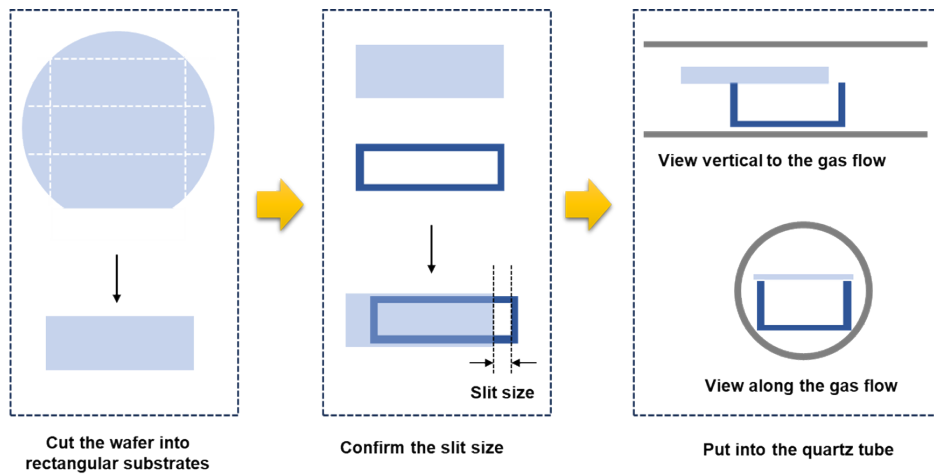

**Fig. S2** The procedures for constructing a confined growth space with a determined slit size.

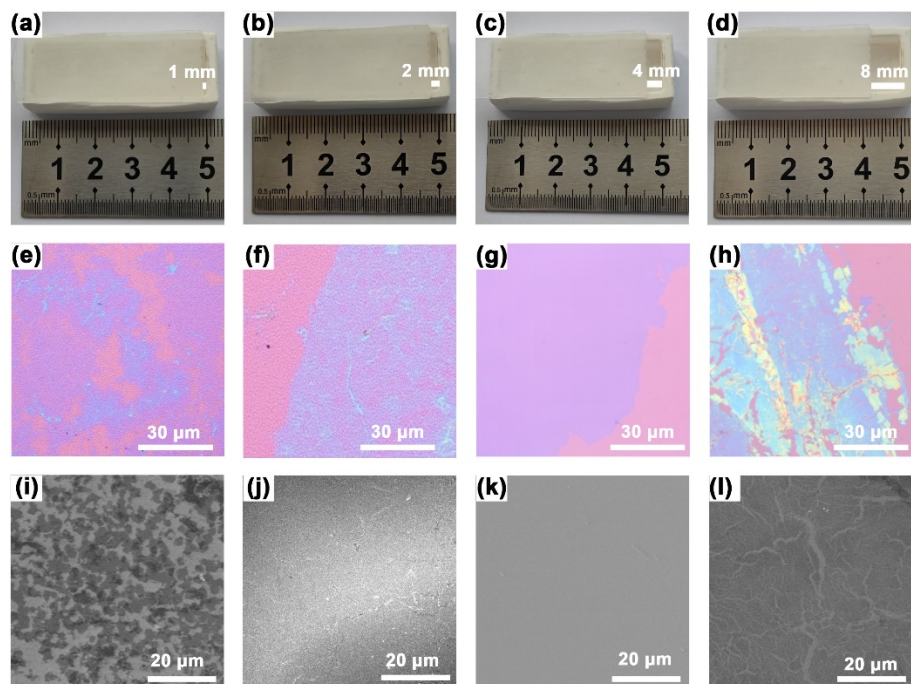

**Fig. S3** The influence of slits on the growth of multilayer h-BN. (a-d) Photographs of ceramic boat with narrow slits of (a) 1 mm, (b) 2 mm, (c) 4 mm, and (d) 8 mm. (e-h) and (i-l) are corresponding optical images and SEM images, respectively.

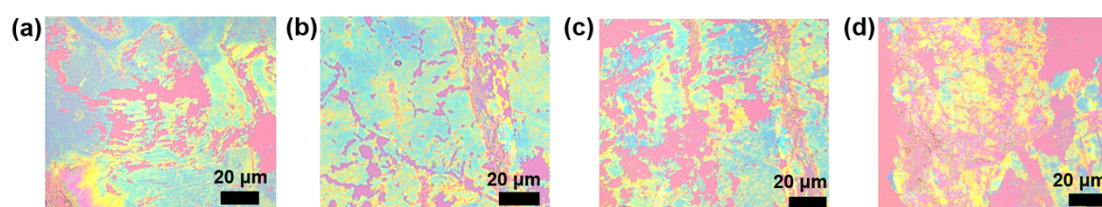

**Fig. S4** Effect of the heating temperature of  $(\text{NH}_4)_2\text{CO}_3$  on the growth of h-BN thin films. (a) – (d) are optical images of the transferred h-BN thin films on  $\text{SiO}_2/\text{Si}$  grown under the heating temperature of 60, 70, 80, and 90 °C.

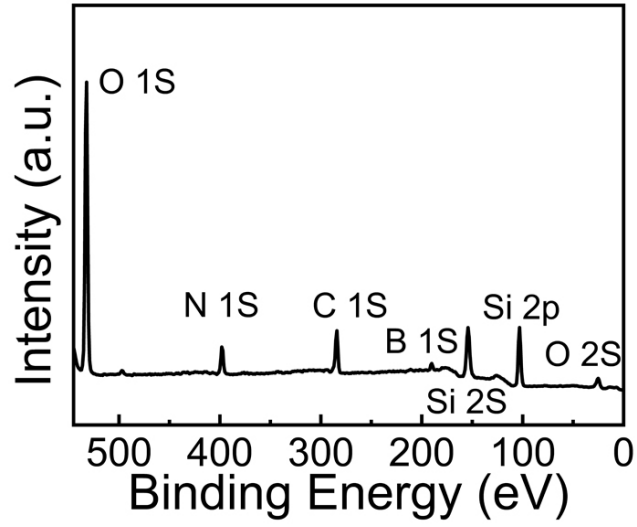

**Fig. S5** XPS full spectrum of h-BN thin films transferred onto SiO<sub>2</sub>/Si substrate.

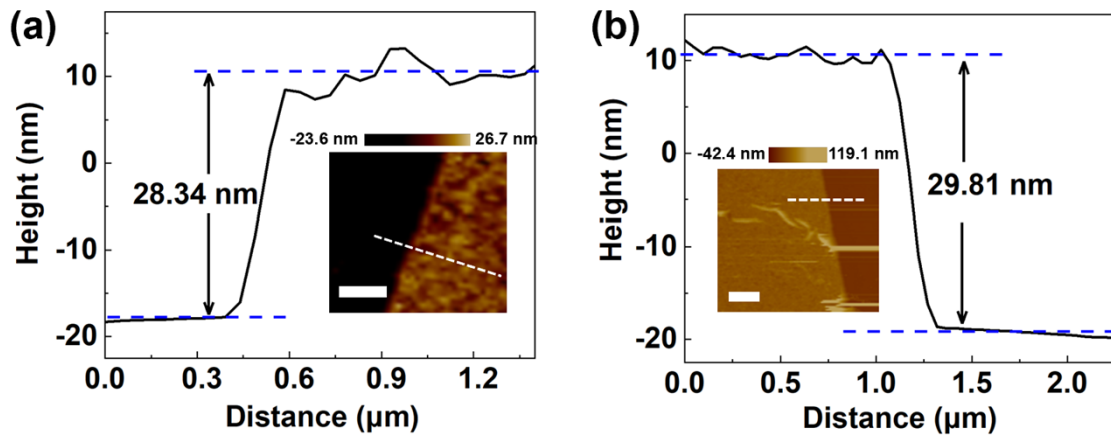

**Fig. S6** h-BN thin film grown in open space. AFM of h-BN grown at the temperature of (a) 800 °C and (b) 1050 °C.

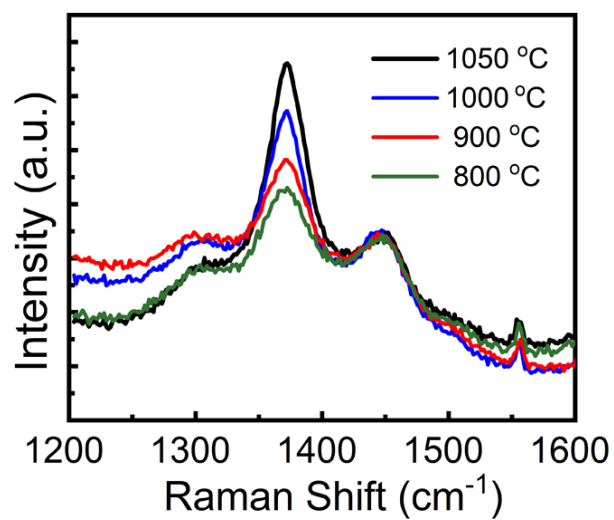

Fig. S7 Raman spectra of multilayer h-BN grown at different temperatures.

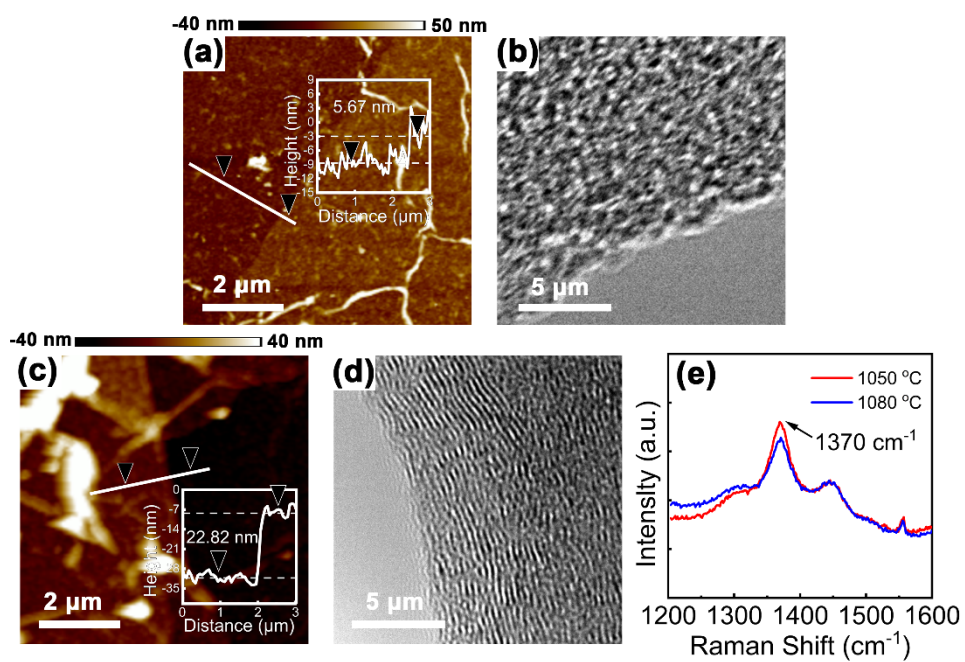

Fig. S8 Characterizations of h-BN thin films grown at (a, b) 700 °C and (c-e) 1080 °C.

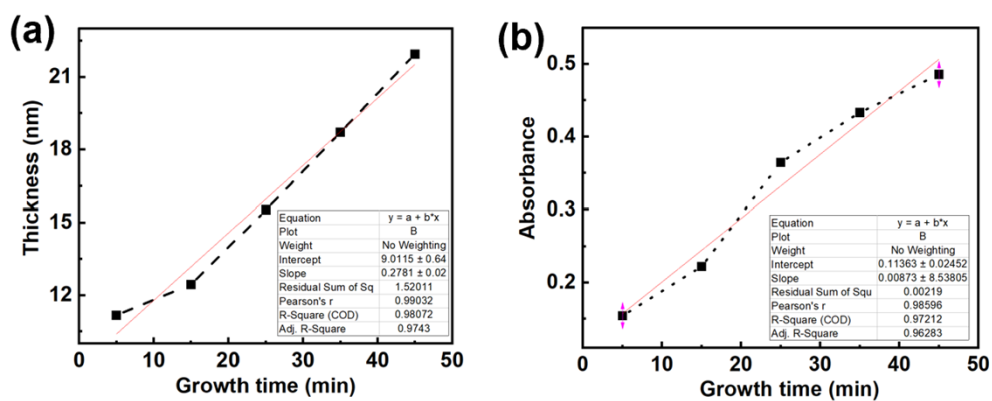

**Fig. S9** Linear fit analysis for the thickness vs. growth time curve (a) and the peak absorbance vs. growth time curve (b).

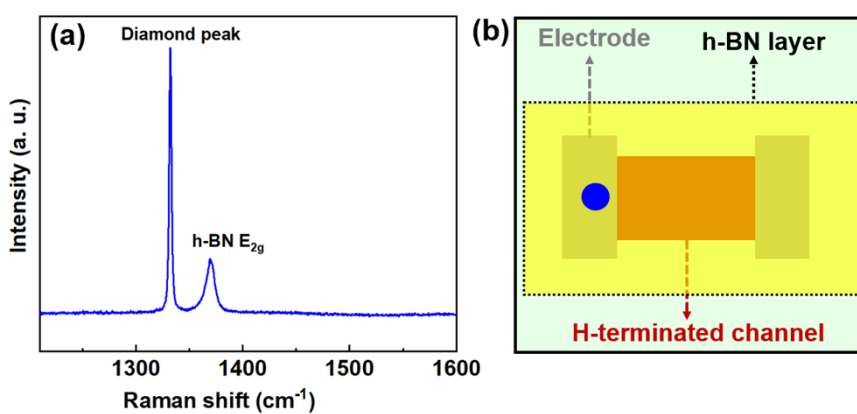

**Fig. S10** (a) Raman spectrum of h-BN/H-diamond heterostructure. (b) The schematic shows the tested point in the device.
